# Supplementary material
Source: PubMed Central journal article supplement (PMC7406289)
Supplement: jciinsight-5-136059-s149.pdf [file jciinsight-5-136059-s149.pdf]

# 1 Supplemental figures and legends

2 **Figure S1.** Flow cytometric analysis for CD206 in BM cells. After 5 d culture with or without  
3 MSCs (in direct or transwell coculture system) and in the presence or absence of GM-CSF (40  
4 ng/ml), BM cells were stimulated with LPS (100 ng/ml) for 18 h and analyzed. Representative  
5 flow cytometry histograms and quantitative results for CD206 were shown. The Fluorescence  
6 Minus One Control (FMO control) was used.

7 Data are displayed as mean  $\pm$  SD and representative of 3 independent sets of experiments (n =  
8 3 to 4 biological replicates in each group per set). A dot depicts data from one biological sample.  
9 \*\*\*\* $P < 0.0001$  by one-way ANOVA and Tukey's multiple-comparison test.

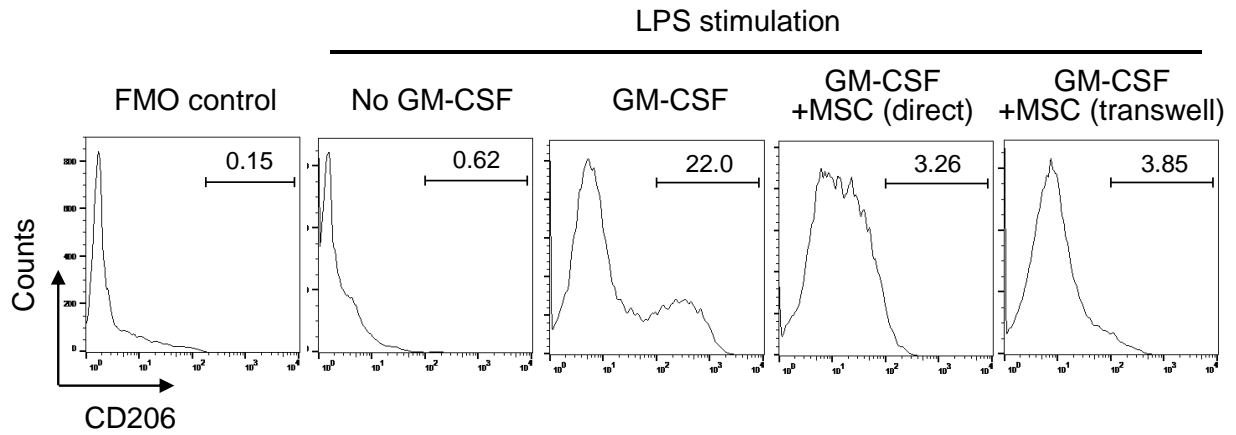

10

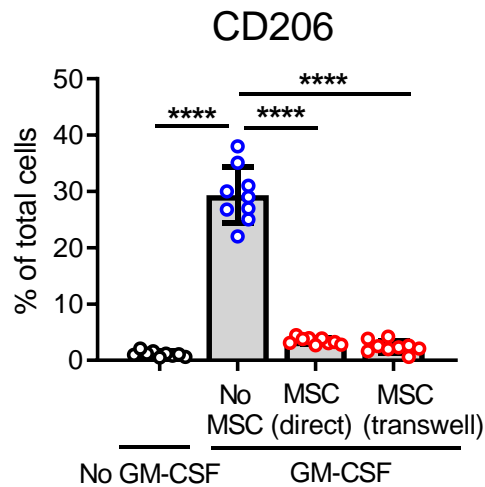

11

12 **Figure S2.** Heat maps of the cell differentiation-related genes from RNA sequencing on  
 13 CD11b<sup>hi</sup>Ly6C<sup>hi</sup>Ly6G<sup>lo</sup>, CD11b<sup>mid</sup>Ly6C<sup>mid</sup>Ly6G<sup>lo</sup>, and CD11b<sup>lo</sup>Ly6C<sup>lo</sup>Ly6G<sup>lo</sup> cells that were sorted  
 14 as in Figure 5A. The first column (blue box) presents changes in the gene expression levels in  
 15 CD11b<sup>hi</sup>Ly6C<sup>hi</sup>Ly6G<sup>lo</sup> cells relative to CD11b<sup>lo</sup>Ly6C<sup>lo</sup>Ly6G<sup>lo</sup> cells, and the second column (red  
 16 box) depicts the gene expression changes in CD11b<sup>mid</sup>Ly6C<sup>mid</sup>Ly6G<sup>lo</sup> cells relative to  
 17 CD11b<sup>lo</sup>Ly6C<sup>lo</sup>Ly6G<sup>lo</sup> cells. See ArrayExpress accession E-MTAB-8975.

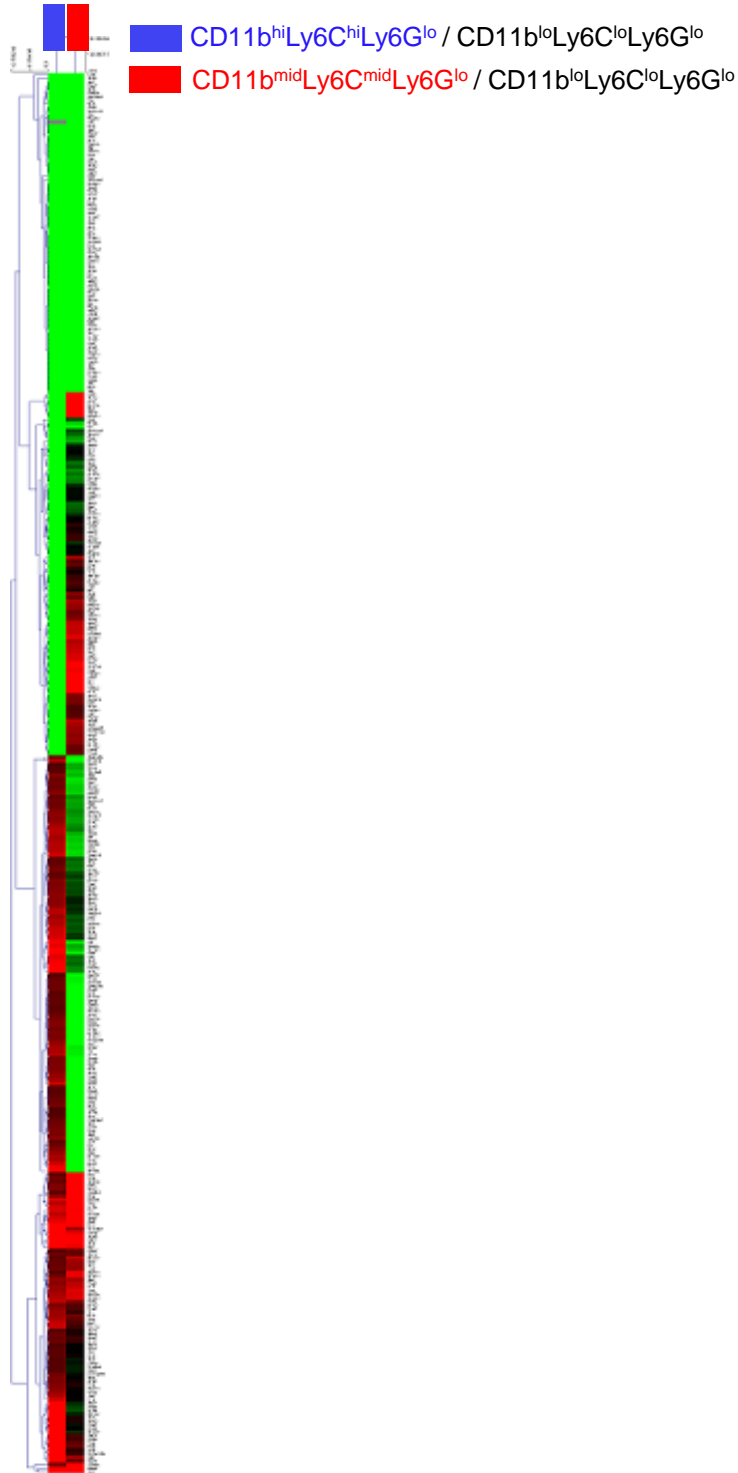

19 **Figure S3. MSC-induced CD11b<sup>mid</sup>Ly6C<sup>mid</sup>Ly6G<sup>lo</sup> cells do not increase CD4<sup>+</sup>Foxp3<sup>+</sup> Treg.**

20 CD11b<sup>lo</sup>Ly6C<sup>lo</sup>Ly6G<sup>lo</sup> cells, CD11b<sup>mid</sup>Ly6C<sup>mid</sup>Ly6G<sup>lo</sup> cells, and CD11b<sup>hi</sup>Ly6C<sup>hi</sup>Ly6G<sup>lo</sup> cells were  
 21 sorted as in Figure 5A and stimulated with LPS (100 ng/ml) for 18 h. CD4<sup>+</sup> cells were isolated  
 22 from the spleen of C57BL/6 mice. The sorted CD11b<sup>lo</sup>Ly6C<sup>lo</sup>Ly6G<sup>lo</sup> cells,  
 23 CD11b<sup>mid</sup>Ly6C<sup>mid</sup>Ly6G<sup>lo</sup> cells, and CD11b<sup>hi</sup>Ly6C<sup>hi</sup>Ly6G<sup>lo</sup> cells were cocultured in a direct  
 24 coculture system with CFSE-prelabeled CD4<sup>+</sup> cells on anti-CD3 and anti-CD28 Ab-coated  
 25 plates for 5 d. The frequency of CD4<sup>+</sup>Foxp3<sup>+</sup>Treg was determined by flow cytometry.  
 26 Representative cytograms and quantitative results are presented.

27 Data (mean ± SD) represent 3 independent sets of experiments (n = 2 to 3 in each group per  
 28 set), and a dot depicts data from one biological sample. \*\*\*\*P < 0.0001 by one-way ANOVA and  
 29 Tukey's multiple-comparison test.

30

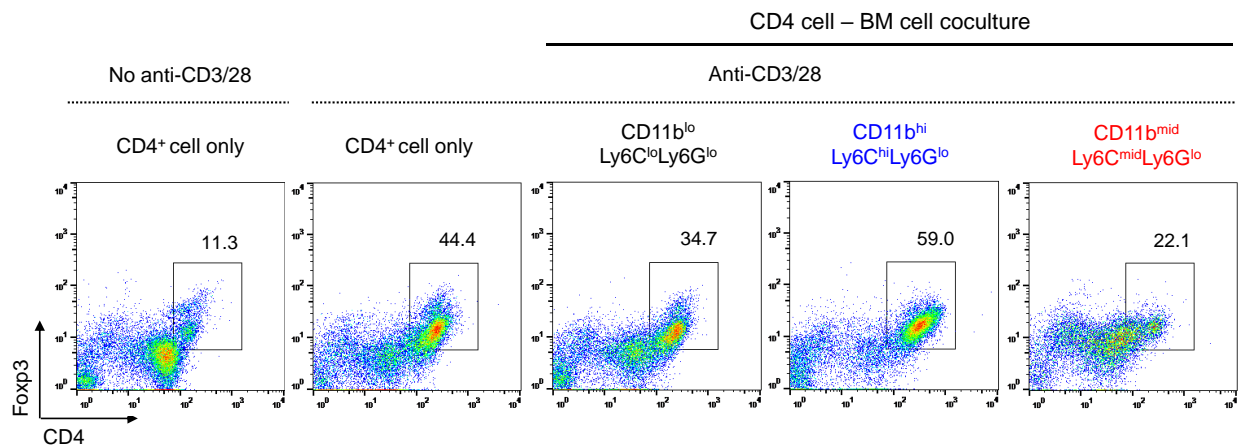

31

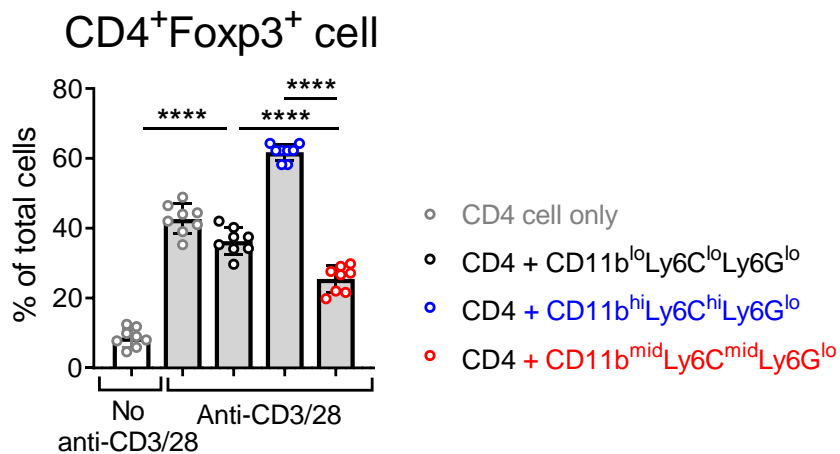

32

33 **Figure S4.** Flow cytometric analysis for CD4<sup>+</sup>Foxp3<sup>+</sup> Treg in draining cervical lymph nodes  
 34 (CLN) in EAU mice at day 21 after treatment with vehicle (Hank's balanced salt solution, BSS),  
 35 CD11b<sup>lo</sup>Ly6C<sup>lo</sup>Ly6G<sup>lo</sup> cells, CD11b<sup>mid</sup>Ly6C<sup>mid</sup>Ly6G<sup>lo</sup> cells, or CD11b<sup>hi</sup>Ly6C<sup>hi</sup>Ly6G<sup>lo</sup> cells. The cells  
 36 were prepared as in Figure 5A, stimulated with LPS (100 ng/ml) for 18 h, and injected  
 37 intravenously into mice right after EAU induction at day 0. Shown are the frequencies of  
 38 CD4<sup>+</sup>Foxp3<sup>+</sup> cells out of total CLN cells. A dot indicates data from an individual animal, and data  
 39 are presented as mean ± SD.

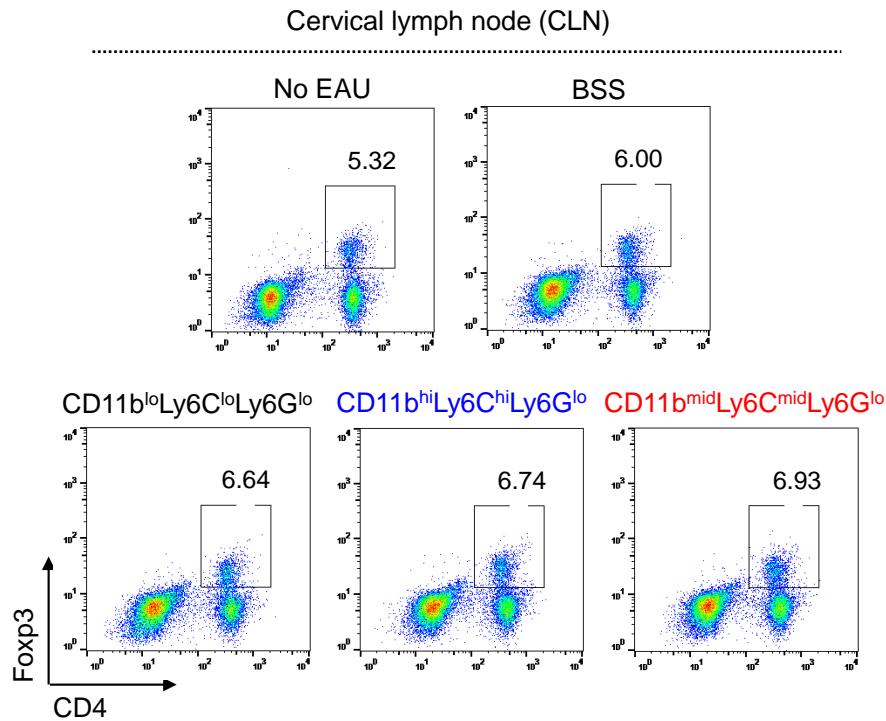

40

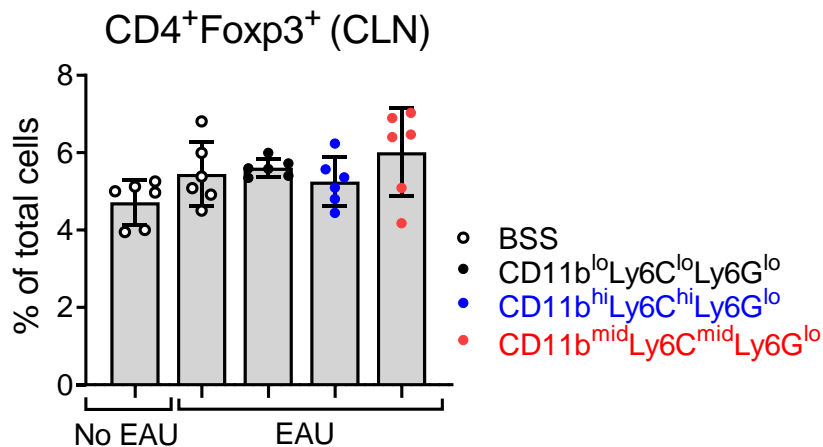

41
